# Supplementary material for: Impact of Maternal Lifestyle and Dietary Habits during Pregnancy on Newborn Metabolic Profile
Source: MDPI journal article supplement (doi:10.3390/nu15102297), 2023-05-13
Supplement: s1 [file s1]

*Supplementary Material of:*

# **Impact of Maternal Lifestyle and Dietary Habits during Pregnancy on Newborn Metabolic Profile**

**Ilaria Cicalini <sup>1,2</sup>, Samanta Moffa <sup>3</sup>, Maria Lucia Tommolini <sup>1,2</sup>, Silvia Valentinuzzi <sup>1,3</sup>, Mirco Zucchelli <sup>1,2</sup>, Ines Bucci <sup>1,4</sup>, Piero Chiacchiaretta <sup>1,2</sup>, Antonella Fontana <sup>3</sup>, Luca Federici <sup>1,2</sup>, Vincenzo De Laurenzi <sup>1,2</sup>, Piero Del Boccio <sup>1,3</sup>, Claudia Rossi <sup>1,2,\*</sup> and Damiana Pieragostino <sup>1,2</sup>**

<sup>1</sup> Center for Advanced Studies and Technology (CAST), “G. d’Annunzio” University of Chieti-Pescara, 66100 Chieti, Italy; [ilaria.cicalini@unich.it](mailto:ilaria.cicalini@unich.it) (I.C.); [maria.tommolini@unich.it](mailto:maria.tommolini@unich.it) (M.L.T.); [silvia.valentinuzzi@unich.it](mailto:silvia.valentinuzzi@unich.it) (S.V.); [m.zucchelli@unich.it](mailto:m.zucchelli@unich.it) (M.Z.); [ines.bucci@unich.it](mailto:ines.bucci@unich.it) (I.B.); [p.chiacchiaretta@unich.it](mailto:p.chiacchiaretta@unich.it) (P.C.); [luca.federici@unich.it](mailto:luca.federici@unich.it) (L.F.); [vincenzo.delaurenzi@unich.it](mailto:vincenzo.delaurenzi@unich.it) (V.D.L.); [p.delboccio@unich.it](mailto:p.delboccio@unich.it) (P.D.B.); [damiana.pieragostino@unich.it](mailto:damiana.pieragostino@unich.it) (D.P.)

<sup>2</sup> Department of Innovative Technologies in Medicine and Dentistry, “G. d’Annunzio” University of Chieti-Pescara, 66100 Chieti, Italy

<sup>3</sup> Department of Pharmacy, “G. d’Annunzio” University of Chieti-Pescara, 66100 Chieti, Italy; [samanta.moffa@unich.it](mailto:samanta.moffa@unich.it) (S.M.); [antonella.fontana@unich.it](mailto:antonella.fontana@unich.it) (A.F.)

<sup>4</sup> Department of Medicine and Aging Science, “G. d’Annunzio” University of Chieti-Pescara, 66100 Chieti, Italy

\* Correspondence: [claudia.rossi@unich.it](mailto:claudia.rossi@unich.it); Tel.: +39-0871-541290

**Figure S1.** C5 and C3/C16 ratio univariate statistical analysis performed by Metaboanalyst based on data from Cluster 3, considering gestational week (g.w.) and antibiotics treatment in newborn.

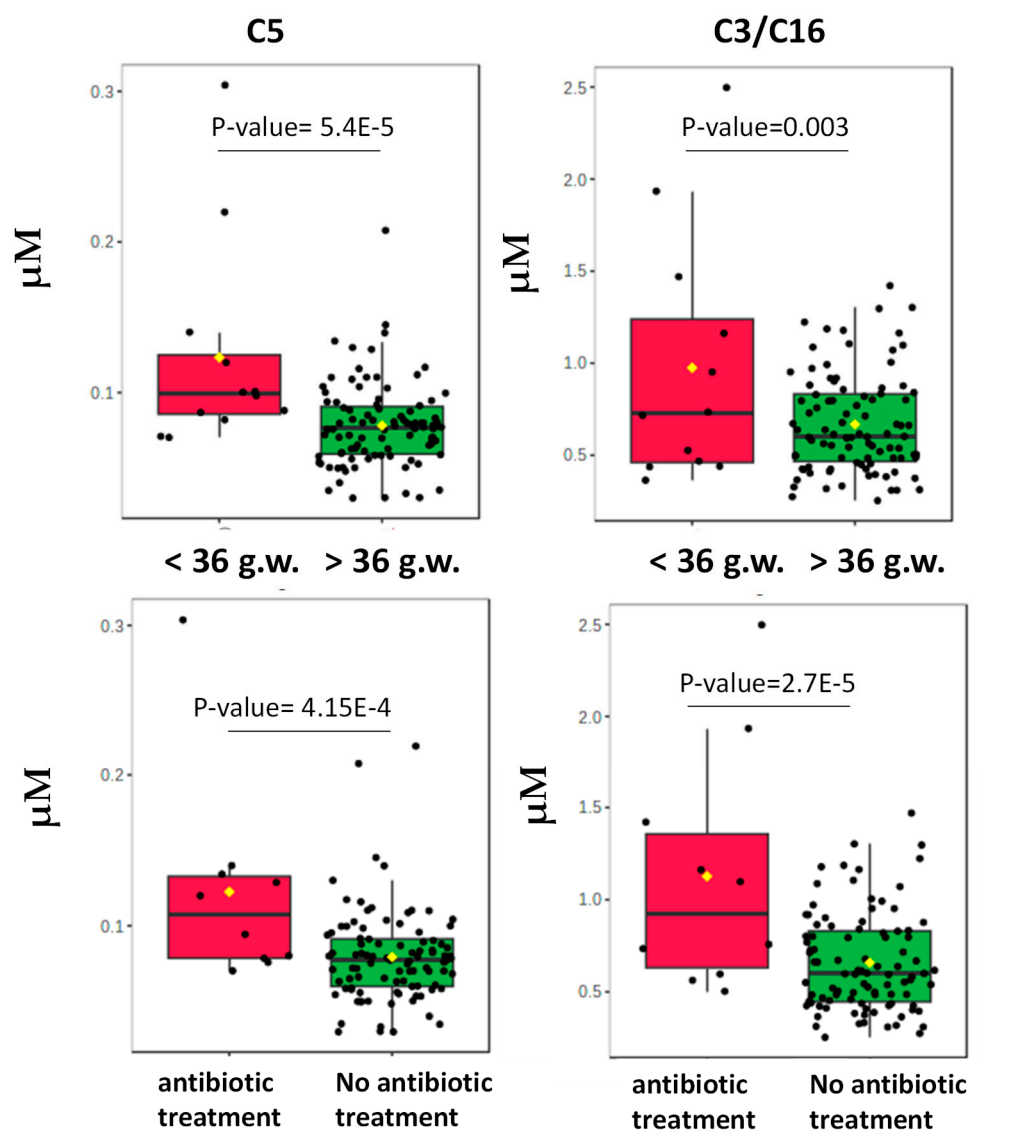

**Figure S2.** Pearson correlation between DBS TSH levels ( $\mu\text{U/mL}$ ) and DBS free carnitine C0 levels ( $\mu\text{M}$ ). R squared is 0.00011, p-value 0.91 (not significant).

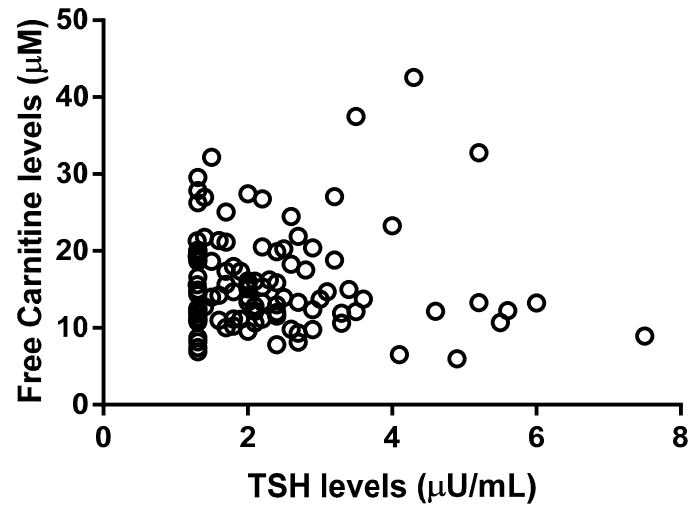

**Table S1.** Mass spectrometry parameters used for FIA-MS/MS analysis on RenataDX™ Screening Systems by NeoBase™ 2 Non-derivatized MSMS kit. For each analyte, MRM transition, cone voltage (V) and collision energy (eV) are shown. The internal standards (ISs) are reported in bold.

| Abbreviations of analytes and ISs                                       | Analyte                                        | Transition                 | Cone potential | Collision energy |
|-------------------------------------------------------------------------|------------------------------------------------|----------------------------|----------------|------------------|
| Arg<br><b><sup>2</sup>H<sub>4</sub>, <sup>13</sup>C-Arg</b>             | Arginine                                       | 175.1>70.1<br>180.1>75.1   | 34             | 21               |
| Cit<br><b>2H<sub>2</sub>-Cit</b>                                        | Citrulline                                     | 176.1>113.1<br>178.1>115.1 | 24             | 16               |
| Leu/Ile/Pro-OH<br><b><sup>2</sup>H<sub>3</sub>-Leu</b>                  | Leucine/Isoleucine/Hydroxyproline              | 132.1>86.1<br>135.1>89.1   | 24             | 10               |
| Met<br><b><sup>2</sup>H<sub>3</sub>-Met</b>                             | Methionine                                     | 150.1>104.1<br>153.1>107.1 | 24             | 10               |
| Phe<br><b><sup>13</sup>C<sub>6</sub>-Phe</b>                            | Phenylalanine                                  | 166.1>120.1<br>172.1>126.1 | 25             | 12               |
| Tyr<br><b><sup>13</sup>C<sub>6</sub>-Tyr</b>                            | Tyrosine                                       | 182.1>136.1<br>188.1>142.1 | 26             | 12               |
| Val<br><b><sup>15</sup>N<sub>2</sub>-<sup>13</sup>C<sub>5</sub>-Val</b> | Valine                                         | 118.1>72.1<br>124.1>77.1   | 23             | 10               |
| C0<br><b><sup>2</sup>H<sub>9</sub>-C0</b>                               | Free carnitine                                 | 162.1>103.0<br>171.2>103.0 | 38             | 16               |
| C2<br><b><sup>2</sup>H<sub>3</sub>-C0</b>                               | Acetylcarnitine                                | 204.1>85.0<br>207.1>85.0   | 34             | 18               |
| C3<br><b><sup>2</sup>H<sub>3</sub>-C3</b>                               | Propionylcarnitine                             | 218.1>85.0<br>221.2>85.0   | 32             | 18               |
| C4<br><b><sup>2</sup>H<sub>3</sub>-C4</b>                               | Butyrylcarnitine                               | 232.2>85.0<br>235.2>85.0   | 36             | 18               |
| C5<br><b><sup>2</sup>H<sub>9</sub>-C5</b>                               | Valeryl carnitine                              | 246.2>85.0<br>255.2>85.0   | 38             | 20               |
| C6<br><b><sup>2</sup>H<sub>3</sub>-C6</b>                               | Hexanoylcarnitine                              | 260.2>85.0<br>263.2>85.0   | 37             | 20               |
| C5DC/C6OH<br><b><sup>2</sup>H<sub>6</sub>-C5DC</b>                      | Glutaryl carnitine/3-Hydroxy-hexanoylcarnitine | 276.2>85.0<br>282.2>85.0   | 40             | 24               |
| C8<br><b><sup>2</sup>H<sub>3</sub>-C8</b>                               | Octanoylcarnitine                              | 288.2>85.0<br>291.2>85.0   | 42             | 22               |
| C10<br><b><sup>2</sup>H<sub>3</sub>-C10</b>                             | Decanoylcarnitine                              | 316.2>85.0<br>319.3>85.0   | 45             | 22               |
| C12<br><b><sup>2</sup>H<sub>3</sub>-C12</b>                             | Dodecanoylcarnitine                            | 344.3>85.0<br>347.3>85.0   | 46             | 24               |
| C14<br><b><sup>2</sup>H<sub>3</sub>-C14</b>                             | Tetradecanoylcarnitine (myristoylcarnitine)    | 372.3>85.0<br>375.3>85.0   | 52             | 25               |
| C16<br><b><sup>2</sup>H<sub>3</sub>-C16</b>                             | Hexadecanoylcarnitine (palmitoylcarnitine)     | 400.3>85.0<br>403.4>85.0   | 55             | 26               |
| C18<br><b><sup>2</sup>H<sub>3</sub>-C18</b>                             | Octadecanoylcarnitine (stearoylcarnitine)      | 428.4>85.0<br>431.4>85.2   | 56             | 28               |

**Table S2.** Questionnaire

| QUESTION                                               | ANSWER (LEGEND)                      |
|--------------------------------------------------------|--------------------------------------|
| Nationality                                            | Italian (0)                          |
|                                                        | Albanian (1)                         |
|                                                        | Brazilian (2)                        |
|                                                        | Spain (3)                            |
|                                                        | Romanian (4)                         |
| Age                                                    |                                      |
| Height (cm)                                            |                                      |
| How much weight did you gain during pregnancy? (kg)    |                                      |
| Pre-pregnancy weight (kg)                              |                                      |
| Is this your first pregnancy?                          | Yes (0)                              |
|                                                        | No (1)                               |
| Have you had abortions?                                | Yes (0)                              |
|                                                        | No (1)                               |
| Did you have toxoplasmosis before pregnancy?           | Yes (0)                              |
|                                                        | No (1)                               |
| Do you have any of the following or another condition? | NONE (0)                             |
|                                                        | Hypothyroidism and pathologies (1)   |
|                                                        | Gestational diabetes (2)             |
|                                                        | Overweight or obesity (3)            |
|                                                        | Coagulation factor 11 deficiency (4) |
|                                                        | Anemia (5)                           |
|                                                        | Hypercholesterolemia (6)             |
| Do you have any intolerance?                           | Yes (0)                              |
|                                                        | No (1)                               |
| Specify intolerances                                   | NONE (0)                             |
|                                                        | Nickel lactose (1)                   |
|                                                        | Lactose, gluten (2)                  |
|                                                        | Lactose (3)                          |
|                                                        | Cheeses (4)                          |
|                                                        | Gluten (5)                           |

|                                                                                         |                                                |
|-----------------------------------------------------------------------------------------|------------------------------------------------|
|                                                                                         | Egg (6)                                        |
|                                                                                         | Legumes (7)                                    |
|                                                                                         | Medicines (8)                                  |
| <b>Do you have any allergies?</b>                                                       | Yes (0)                                        |
|                                                                                         | No (1)                                         |
| <b>Specify allergies</b>                                                                | None (0)                                       |
|                                                                                         | Formaldehyde, potassium dichromate, nickel (1) |
|                                                                                         | Shellfish (2)                                  |
|                                                                                         | Pollen (3)                                     |
|                                                                                         | Allergic rhinoconjunctivitis (grasses) (4)     |
|                                                                                         | dust, cat fur, olive on the nose (5)           |
|                                                                                         | Pollen, dust (6)                               |
|                                                                                         | Mites (7)                                      |
|                                                                                         | Nickel scent parietal pollen (8)               |
|                                                                                         | Mold ( <i>Alternaria alternata</i> ) (9)       |
|                                                                                         | Hazelnuts, peanuts (10)                        |
|                                                                                         | Allergic reaction to cortisone (11)            |
|                                                                                         | Pollen, cat (12)                               |
|                                                                                         | Mushrooms, dust, grasses (13)                  |
|                                                                                         | Pollen, penicillin (14)                        |
|                                                                                         | Peanuts and soy (15)                           |
|                                                                                         | Azithromycin powder (16)                       |
|                                                                                         | Fluoroquinolones (17)                          |
|                                                                                         | Medicines (18)                                 |
|                                                                                         | Nickel (19)                                    |
|                                                                                         | Penicillin (20)                                |
|                                                                                         | Clams (21)                                     |
| <b>Did you smoke?</b>                                                                   | Yes (0)                                        |
|                                                                                         | No (1)                                         |
| <b>Have you done any physical activity (walking, swimming, yoga, exercise bike...)?</b> | Yes (0)                                        |
|                                                                                         | No (1)                                         |

|                                          |                                                 |
|------------------------------------------|-------------------------------------------------|
| Have you taken any medications?          | Yes (0)                                         |
|                                          | No (1)                                          |
| Specify which medications you have taken | Nobody                                          |
|                                          | Tyrosint - Eutirox                              |
|                                          | Cardioaspirin, tyrosint 25                      |
|                                          | Aspirin                                         |
|                                          | Folic acid, cardioaspirin, nuperal (antinausea) |
|                                          | Lentogest (progestogens)                        |
|                                          | Anti nausea                                     |
|                                          | Antibiotic                                      |
|                                          | Tardifer (antianemic)                           |
|                                          | Clexane 4000 -fluxum (anticoagulants)           |
|                                          | EPITARAM (antiepileptics)                       |
|                                          | antibiotics + tachypirine                       |
|                                          | Eutirox progesterone spasmex                    |
|                                          | Tachipirina and anti-inflammatories             |
|                                          | Progestin and anticoagulant                     |
|                                          | Antibiotics + cortisone                         |
|                                          | Antidepressants                                 |
|                                          | Antibiotics + progestogens                      |
|                                          | Cardioaspirin + progestogens                    |
| What type of diet did you follow?        | None                                            |
|                                          | Mediterranean diet                              |
|                                          | Gestational diabetes diet                       |
| Did you use iodized salt?                | Yes (0)                                         |
|                                          | No (1)                                          |
| Have you used food supplements?          | Yes, occasionally                               |
|                                          | Yes, every day                                  |
|                                          | No                                              |
| What kind of supplements did you take?   | Folic acid (0)                                  |
|                                          | Iron, Omega-3 (1)                               |
|                                          | Folic acid, Vitamin D, iron (2)                 |

|                                                 |                                                |
|-------------------------------------------------|------------------------------------------------|
|                                                 | Folic acid, Iron (3)                           |
|                                                 | Salivit (4)                                    |
|                                                 | Folic acid, Multivitamin (5)                   |
|                                                 | Folic acid, Iron, Probiotics (6)               |
|                                                 | Nobody (7)                                     |
|                                                 | Folic acid, Vitamin C (8)                      |
|                                                 | Iron (9)                                       |
|                                                 | Folic acid, Vitamin B12, Iron, Magnesium (10)  |
|                                                 | Folic acid, Vitamin K, Calcium, Magnesium (11) |
|                                                 | Also used after childbirth:                    |
|                                                 | Vitamin D (13)                                 |
|                                                 | Magnesium (14)                                 |
| <b>Are you taking any medications?</b>          | Yes (0)                                        |
|                                                 | No (1)                                         |
| <b>Specify which medications you are taking</b> | Nobody (0)                                     |
|                                                 | Tyrosint - Eutirox (1)                         |
|                                                 | Epitaram (2)                                   |
|                                                 | Sereupin - Patoxetine (antidepressants) (3)    |
|                                                 | Tardifer (4)                                   |
|                                                 | To regulate blood pressure (5)                 |
|                                                 | Antibiotics (6)                                |
| <b>Are you using dietary supplements?</b>       | Yes, occasionally (0)                          |
|                                                 | Yes, every day (1)                             |
|                                                 | No (2)                                         |
| <b>Toxoplasmosis test during pregnancy</b>      | Positive (0)                                   |
|                                                 | Negative (1)                                   |
| <b>Do you prefer whole grains?</b>              | Yes (0)                                        |
|                                                 | No (1)                                         |
| <b>What condiments do you prefer?</b>           | Extra virgin olive oil (0)                     |
|                                                 | Extra virgin olive oil, Butter (1)             |
|                                                 | Extra virgin olive oil, seed oil, butter (2)   |



|                                                   |                                          |
|---------------------------------------------------|------------------------------------------|
|                                                   | Extra virgin olive oil, butter, ghee (3) |
|                                                   | Extra virgin olive oil, Seed oil (4)     |
| <b>What type of diet do you currently follow?</b> | None (0)                                 |
|                                                   | Mediterranean diet (1)                   |
|                                                   | Ketogenic (2)                            |
| <b>Your baby is fed with</b>                      | Mother's milk (0)                        |
|                                                   | Breast milk, Artificial milk (1)         |
|                                                   | Artificial milk (2)                      |
|                                                   | Special milk (3)                         |
| <b>What type of diet did you follow?</b>          | None (0)                                 |
|                                                   | Mediterranean diet (1)                   |
|                                                   | Gestational diabetes diet (2)            |
